# Supplementary material for: Microbiome diversity declines while distinct expansions of Th17, iNKT, and dendritic cell subpopulations emerge after anastomosis surgery
Source: Springer Nature journal article supplement (doi:10.1186/s13099-021-00447-z), 2021-08-10

Supp. Figure 3.

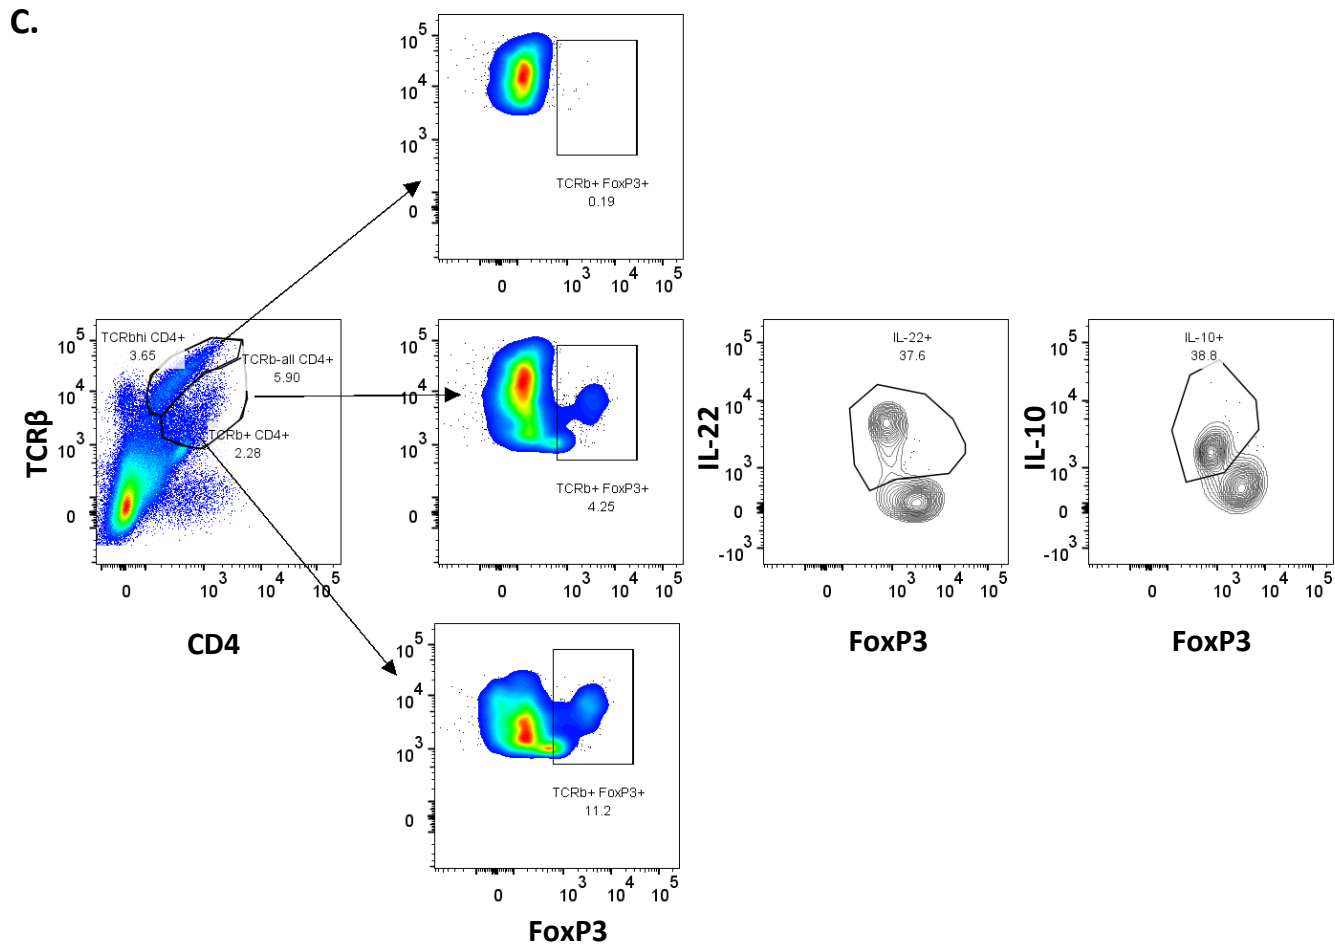

Supplement: MOESM4 [file 19559488]
