# Supplementary material for: Microbiome diversity declines while distinct expansions of Th17, iNKT, and dendritic cell subpopulations emerge after anastomosis surgery
Source: Springer Nature journal article supplement (doi:10.1186/s13099-021-00447-z), 2021-08-10
Supplement: MOESM9 [file 19559488]

Supp. Table 1.

| Pearson correlation coefficient, r | Control | Segment A        | Segment B       | Segment C       |
|------------------------------------|---------|------------------|-----------------|-----------------|
| iNKT IL-22 vs. Bacteroidetes       | -0.4894 | -0.3118          | 0.3392          | -0.4098         |
| iNKT IL-10 vs. Bacteroidetes       | -0.4412 | -0.02952         | 0.3245          | -0.4995         |
| DCs vs. Bacteroidetes              | -0.3533 | 0.02185          | 0.2623          | 0.1635          |
| Th17 vs. Bacteroidetes             | -0.4111 | -0.2859          | 0.07618         | -0.15           |
| Treg vs. Bacteroidetes             | 0.3629  | <b>-0.8083 *</b> | 0.9424          | 0.8040          |
| iNKT IL-22 vs. Firmicutes          | 0.6123  | 0.2323           | 0.3431          | 0.528           |
| iNKT IL-10 vs. Firmicutes          | 0.5967  | 0.5867           | <b>0.8186 *</b> | <b>0.719 *</b>  |
| DCs vs. Firmicutes                 | 0.6096  | -0.4021          | -0.02808        | -0.006609       |
| Th17 vs. Firmicutes                | 0.7183  | 0.3504           | 0.1259          | 0.6544          |
| Treg vs. Firmicutes                | 0.8850  | 0.2248           | 0.9777          | <b>0.0428 *</b> |
| iNKT IL-22 vs. Proteobacteria      | 0.04811 | -0.1008          | -0.455          | 0.03368         |
| iNKT IL-10 vs. Proteobacteria      | 0.03837 | -0.4981          | -0.5213         | -0.003072       |
| DCs vs. Proteobacteria             | 0.996   | 0.3173           | -0.2397         | -0.1618         |
| Th17 vs. Proteobacteria            | -0.2696 | -0.2188          | -0.1599         | -0.2885         |
| Treg vs. Proteobacteria            | 0.9007  | <b>0.0282 *</b>  | 0.8947          | 0.1661          |
