# Supplementary material for: Microbiome diversity declines while distinct expansions of Th17, iNKT, and dendritic cell subpopulations emerge after anastomosis surgery
Source: Springer Nature journal article supplement (doi:10.1186/s13099-021-00447-z), 2021-08-10
Supplement: MOESM10 [file 19559488]

Supp. Table 2.

| Pearson correlation coefficient, r | Control  | End-to-end Anastomosis | Roux-en-Y |
|------------------------------------|----------|------------------------|-----------|
| iNKT IL-22 vs. Bacteroidetes       | -0.4894  | -0.4255                | -0.1539   |
| iNKT IL-10 vs. Bacteroidetes       | -0.4412  | -0.3247                | -0.1628   |
| DCs vs. Bacteroidetes              | -0.3533  | -0.3291                | 0.07444   |
| Th17 vs. Bacteroidetes             | -0.4111  | -0.2713                | -0.198    |
| Treg vs. Bacteroidetes             | 0.3629   | -0.3311                | -0.2634   |
| iNKT IL-22 vs. Firmicutes          | 0.6123   | 0.5621                 | 0.1521    |
| iNKT IL-10 vs. Firmicutes          | 0.5967   | <b>0.8138 *</b>        | 0.2951    |
| DCs vs. Firmicutes                 | 0.6096   | -0.1984                | -0.3143   |
| Th17 vs. Firmicutes                | 0.7183   | <b>0.8151 *</b>        | 0.073     |
| Treg vs. Firmicutes                | 0.1150   | 0.2151                 | -0.1493   |
| iNKT IL-22 vs. Proteobacteria      | 0.04811  | 0.007948               | -0.08512  |
| iNKT IL-10 vs. Proteobacteria      | 0.03837  | -0.2088                | -0.2126   |
| DCs vs. Proteobacteria             | 0.996    | 0.3957                 | 0.1931    |
| Th17 vs. Proteobacteria            | -0.2696  | -0.1969                | -0.01882  |
| Treg vs. Proteobacteria            | -0.09934 | 0.1908                 | 0.2217    |
